# Supplementary material
Source: publisher figshare collection journal article supplement (https://acs.figshare.com/ndownloader/files/4103788)
Supplement: Supplementary file 1 [file 4103788]

**Table S1.** Melting temperatures ( $T_m$ ) and sequences of forward and reverse primers used of construction of HvTrxh2 mutants

| <b>Mutation</b> | <b><math>T_m</math></b> | <b>Forward primer</b>                           | <b>Reverse primer</b>                          |
|-----------------|-------------------------|-------------------------------------------------|------------------------------------------------|
| E86R            | 78.6                    | CCATTGCTGAGCAATTCAGTGACGTGCCATGCCAACGTTCTCTG    | CAGGAACGTTGGCATGGCACGTACACTGAATTGCTCAGCAATGG   |
| M88A            | 78.6                    | GAGCAATTCAGTGTCGAGGCTGCACCAACGTTCTCTGTTTCATGAAG | CTTCATGAACAGGAACGTTG GTGCAGCCTCGACACTGAATTGCTC |
| M88G            | 78.2                    | GCAATTCAGTGTCGAGGCCGGCCCAACGTTCTCTG             | CAGGAACGTTGGGCCGGCCTCGACACTGAATTGC             |
| M88L            | 78.8                    | GAGCAATTCAGTGTCGAGGCTCTTCCAACGTTCTCTGTTTCATG    | CATGAACAGGAACGTTGGAAGAGCCTCGACACTGAATTGCTC     |
| M88P            | 78.5                    | GCAATTCAGTGTCGAGGCTCCTCCAACGTTCTCTGTTTCATGAAGG  | CCTTCATGAACAGGAACGTTGGAGGAGCCTCGACACTGAATTGC   |
| A106G           | 78.7                    | GGACAGGGTTGTCGGTGGTATCAAGGAGGAACTG              | CAGTTCCTCCTTGATACCAACCGACAACCCTGTCC            |
| A106P           | 78.25                   | GACAGGGTTGTCGGGCCCATCAAGGAGGAACTGAC             | GTCAGTTCCTCCTTGATGGGCCCGACAACCCTGTC            |
| A106S           | 78.8                    | GACAGGGTTGTCGGATCCATCAAGGAGGAACTGAC             | GTCAGTTCCTCCTTGATGGATCCGACAACCCTGTC            |
| A106Y           | 78.6                    | GGACAGGGTTGTCGGTTATATCAAGGAGGAACTGACCGC         | GCGGTCAGTTCCTCCTTGATATAACCGACAACCCTGTCC        |

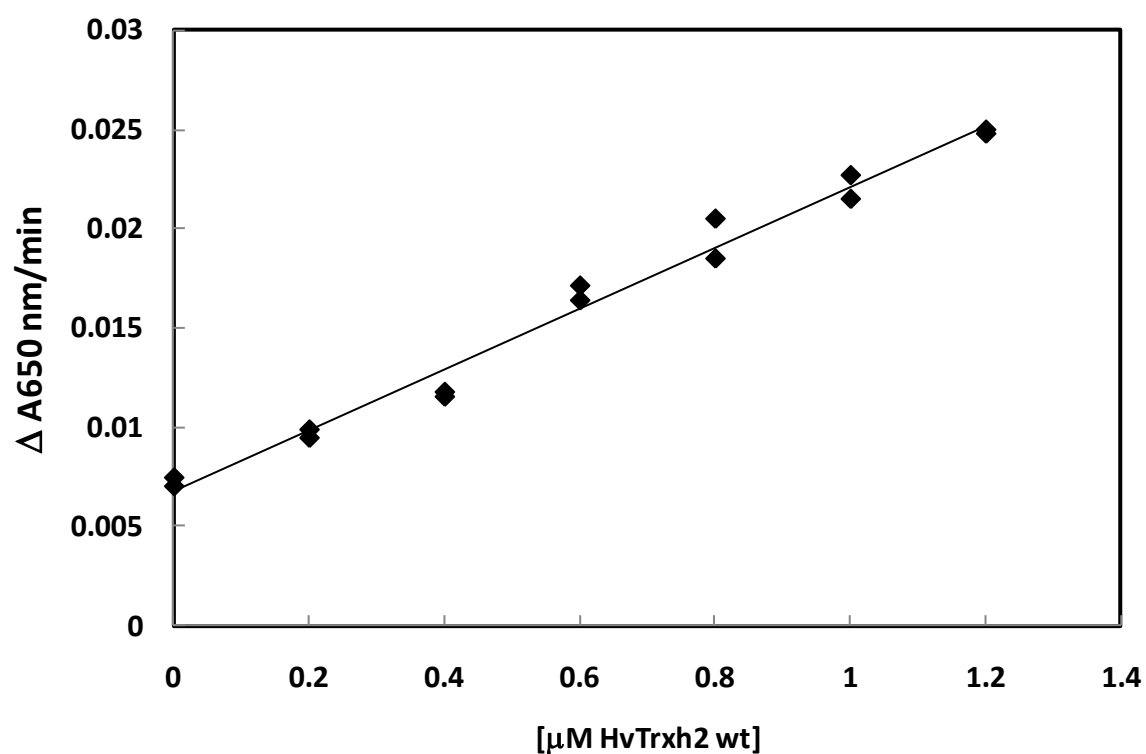

**Figure S1.** Reduction of disulfide bonds in bovine insulin by HvTrxh2 wt (0.2–1.0  $\mu\text{M}$ ) was assayed as described (see Experimental Procedures). Turbidity was monitored as absorbance at 650 nm and the rates of absorbance change at 650 nm per minute in the interval between 0.1 and 0.2 absorbance units were determined.

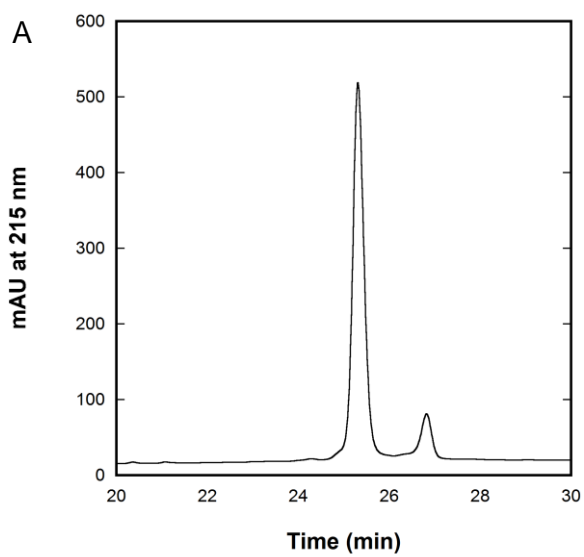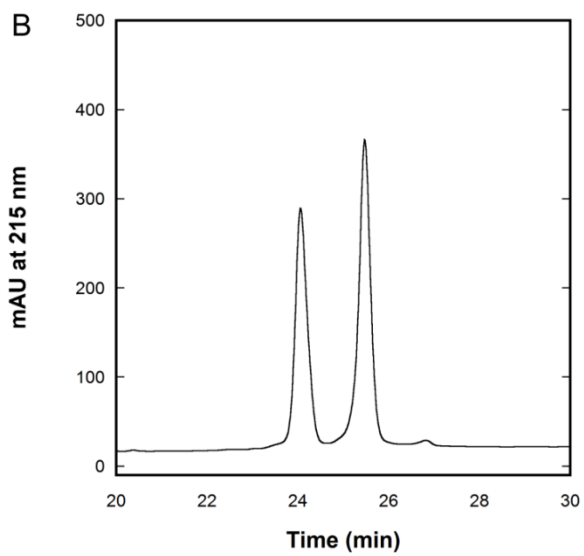

**Figure S2.** Chromatograms of HvTrxh2 wt (A) and M88P (B) subjected to a 4 min incubation with DTT (100  $\mu$ M) and separation on a C18 column. Reduced proteins elute earlier than oxidized and the retention times of wt (A) and M88P (B) are not identical. At the 4-min time point, the wt protein is reduced to ca 90 % whereas the mutant is only reduced to a level of ca 45 %.

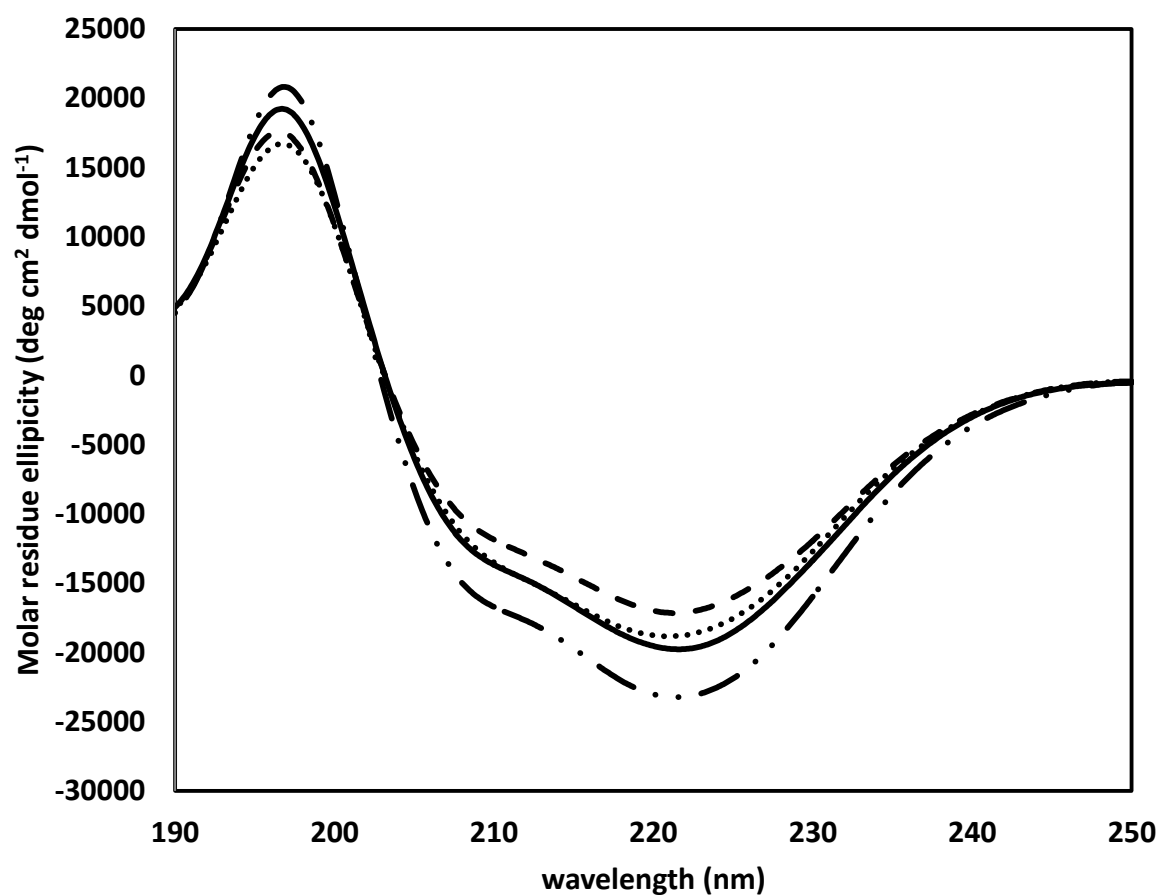

**Figure S3.** CD spectra of 10  $\mu$ M HvTrxh2 wt (solid line), M88P (dashed/dotted line), M88G (dotted line) and A106P (dashed line) in 20 mM  $\text{NaH}_2\text{PO}_4$  pH 7.0 acquired on a Jasco J-600 CD spectrometer at 25°C.

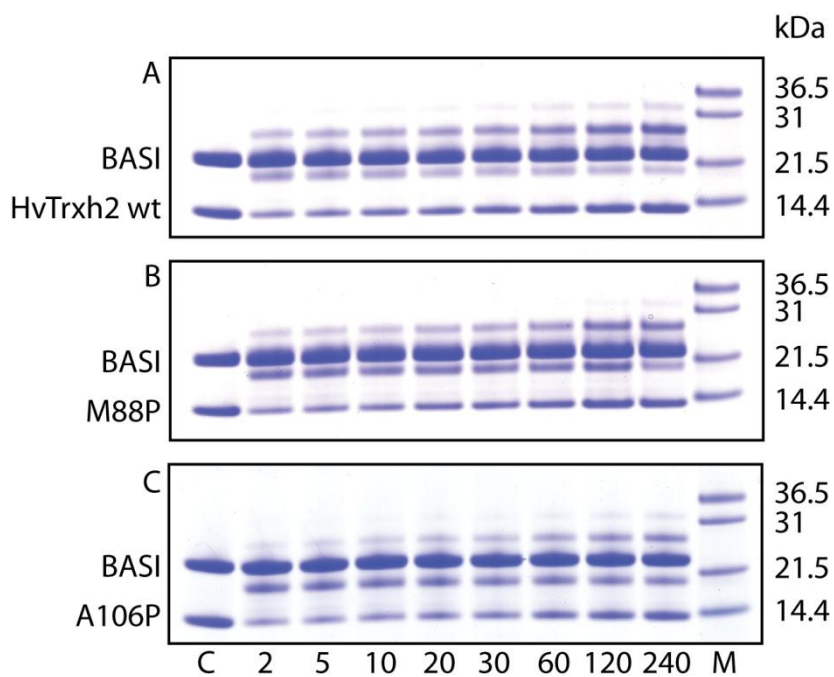

**Figure S4.** Reduction of BASI by HvTrxh2 wt (A), M88P (B), and A106P (C) visualized by TMM(PEG)<sub>12</sub> labeling. BASI (20  $\mu$ M) and reduced Trx (20  $\mu$ M) were incubated on ice bath in Reaction Buffer. At 2, 5 10, 20, 60, 120 and 240 min, aliquots were removed and reduced disulfides in BASI were modified by TMM(PEG)<sub>12</sub>. Control (C) with non-labeled sample containing BASI and reduced Trx. Molecular weights (kDa) of marker proteins (M) are indicated.
